# Supplementary material
Source: Research Square preprint supplement (doi:10.21203/rs.3.rs-9232875/v1)
Supplement: Supplementary file 2 [file e98bd16da6027731eb094909.pdf]

| Figure 2  | Variable analyzed                                 | Groups compared                                                                 | Test                       | n (per group)          | Mean ± SEM                | Test statistic (df) | P value                  |
|-----------|---------------------------------------------------|---------------------------------------------------------------------------------|----------------------------|------------------------|---------------------------|---------------------|--------------------------|
| 2a        | Cell viability (%)                                | UT vs Normalized light signal                                                   | One-way ANOVA              | 6 (3 plates x 3 wells) | 111 ± 5.13                | F (5, 30) = 2.819   | P = 0.0334               |
|           |                                                   |                                                                                 |                            |                        | 109 ± 5.32                |                     |                          |
|           |                                                   |                                                                                 |                            |                        | 89.5 ± 7.03               |                     |                          |
|           |                                                   |                                                                                 |                            |                        | 117 ± 6.69                |                     |                          |
| 2b        | Cell viability (%)                                | UT vs Polymersomes without light<br>UT vs Polymersomes with light<br>UT vs DMSO | One-way ANOVA              | 6 (3 plates x 3 wells) | 108 ± 7.02                | F (12, 64) = 15.28  | <b>P &lt; 0.0001****</b> |
|           |                                                   |                                                                                 |                            |                        | 110 ± 4.57                |                     |                          |
|           |                                                   |                                                                                 |                            |                        | 109 ± 5.73                |                     |                          |
|           |                                                   |                                                                                 |                            |                        | 115 ± 8.62                |                     |                          |
|           |                                                   |                                                                                 |                            |                        | 118 ± 4.05                |                     |                          |
|           |                                                   |                                                                                 |                            |                        | 102 ± 3.75                |                     |                          |
|           |                                                   |                                                                                 |                            |                        | 110 ± 4.80                |                     |                          |
|           |                                                   |                                                                                 |                            |                        | 100 ± 3.72                |                     |                          |
| 4c left   | Inhibition response (%)                           | Interaction<br>Polymersomes (without or with)<br>Light intensity (8% or 12%)    | Two-way ANOVA              | 16-31                  | 115 ± 4.18                | F(1, 86) = 1.453    | P = 0.2314               |
|           |                                                   |                                                                                 |                            |                        | 104 ± 4.91                |                     |                          |
|           |                                                   |                                                                                 |                            |                        | 99.4 ± 2.16               |                     |                          |
|           |                                                   |                                                                                 |                            |                        | 71.7 ± 1.74               |                     |                          |
| 4c left   | Inhibition response (%)                           | Interaction<br>Polymersomes (without or with)<br>Light intensity (8% or 12%)    | Two-way ANOVA              | 16-31                  | 52.0 ± 6.94               | F(1, 86) = 30.60    | <b>P &lt; 0.0001****</b> |
|           |                                                   |                                                                                 |                            |                        | 8% without: -0.166 ± 1.60 |                     |                          |
|           |                                                   |                                                                                 |                            |                        | 12% without: 3.27 ± 0.948 |                     |                          |
|           |                                                   |                                                                                 |                            |                        | 8% with: 12.7 ± 2.60      |                     |                          |
| 4c left   | Inhibition response (%)                           | Interaction<br>Polymersomes (without or with)<br>Light intensity (8% or 12%)    | Two-way ANOVA              | 16-31                  | 12% with : 23.4 ± 6.10    | F(1,86) = 5.548     | <b>P = 0.0208*</b>       |
|           |                                                   |                                                                                 |                            |                        |                           |                     |                          |
|           |                                                   |                                                                                 |                            |                        |                           |                     |                          |
|           |                                                   |                                                                                 |                            |                        |                           |                     |                          |
| Figure 3  | Variable analyzed                                 | Groups compared                                                                 | Test                       | n (per group)          | Mean ± SEM                | Test statistic (df) | P value                  |
| 3b left   | IBA1 48h relative weighted intensity polymersomes | Medium vs Polymersomes                                                          | Unpaired two-tailed t-test | 5 ; 5                  | 1.16 ± 0.0753             | t = 1.610, df = 8   | P = 0.1461               |
| 3b right  | GFAP 48h relative weighted intensity polymersomes | Medium vs Polymersomes                                                          | Unpaired two-tailed t-test | 3 ; 5                  | 1.46 ± 0.167              | U = 3               | P = 0.2500               |
|           |                                                   |                                                                                 |                            |                        | 1.41 ± 0.0222             |                     |                          |
| 3c left   | IBA1 3W relative weighted intensity polymersomes  | Medium vs Polymersomes                                                          | Unpaired two-tailed t-test | 5 ; 3                  | 1.21 ± 0.208              | t = 1.976, df = 6   | P = 0.0955               |
|           |                                                   |                                                                                 |                            |                        | 1.05 ± 0.0156             |                     |                          |
| 3c right  | GFAP 3W relative weighted intensity polymersomes  | Medium vs Polymersomes                                                          | Unpaired two-tailed t-test | 5 ; 4                  | 1.01 ± 0.0104             | t = 0.7491, df = 7  | P = 0.4782               |
|           |                                                   |                                                                                 |                            |                        | 1.20 ± 0.665              |                     |                          |
| Figure S2 | Variable analyzed                                 | Groups compared                                                                 | Test                       | n (per group)          | 1.27 ± 0.0775             | U = 59666           | <b>P &lt; 0.0001****</b> |
|           |                                                   |                                                                                 |                            |                        | 8.37 ± 0.161              |                     |                          |
| S2c left  | Diameter (µm)                                     | Without vs With CNQX                                                            | Unpaired two-tailed t-test | 372 ; 86               | 7.62 ± 0.156              |                     |                          |
| S2d right | Release time (s)                                  | Without vs With CNQX                                                            | Unpaired two-tailed t-test | 41 ; 52                | 6.39 ± 0.904              | U = 865             | P = 0.1192               |
|           |                                                   |                                                                                 |                            |                        | 8.12 ± 0.904              |                     |                          |
| Figure S3 | Variable analyzed                                 | Groups compared                                                                 | Test                       | n (per group)          | Mean ± SEM                | Test statistic (df) | P value                  |
| S3c left  | Peak Area (mV.ms)                                 | Base vs Post                                                                    | Paired two-tailed t-test   | 16                     | -9.31 ± 2.20              | W = 22              | P = 0.5877               |
|           |                                                   |                                                                                 |                            |                        | -9.08 ± 2.06              |                     |                          |
| S3c right | Peak Area (mV.ms)                                 | Base vs Post                                                                    | Paired two-tailed t-test   | 31                     | -6.03 ± 0.456             | W = 250             | <b>P = 0.0088**</b>      |
|           |                                                   |                                                                                 |                            |                        | -5.90 ± 0.455             |                     |                          |

|                  |                          |                        |                          |                      |                                |                            |                          |
|------------------|--------------------------|------------------------|--------------------------|----------------------|--------------------------------|----------------------------|--------------------------|
| S3d              | Peak Area (mV.ms)        | Base vs Post           | Paired two-tailed t-test | 13                   | -3.23 ± 0.443<br>-3.20 ± 0.455 | W = -1                     | P > 0.9999               |
| S3e              | Peak Area (mV.ms)        | Base vs Post           | Paired two-tailed t-test | 26                   | -3.25 ± 0.263<br>-2.88 ± 0.258 | W = 309                    | <b>P &lt; 0.0001****</b> |
| S3f              | Peak Area (mV.ms)        | Base vs Post           | Paired two-tailed t-test | 26                   | -4.39 ± 0.231<br>-4.22 ± 0.224 | W = 257                    | <b>P = 0.0006****</b>    |
| <b>Figure S4</b> | <b>Variable analyzed</b> | <b>Groups compared</b> | <b>Test</b>              | <b>n (per group)</b> | <b>Mean ± SEM</b>              | <b>Test statistic (df)</b> | <b>P value</b>           |
| S4c              | Peak Area (mV.ms)        | Base vs Post           | Paired two-tailed t-test | 12                   | -7.56 ± 0.946<br>-6.99 ± 1.07  | W = 78                     | <b>P = 0.0005****</b>    |
| S4d              | Peak Area (mV.ms)        | Base vs Post           | Paired two-tailed t-test | 15                   | -4.02 ± 0.171<br>-3.80 ± 0.204 | W = 86                     | <b>P = 0.0125*</b>       |
| S4e              | Peak Area (mV.ms)        | Base vs Post           | Paired two-tailed t-test | 27                   | -5.37 ± 1.17<br>-5.26 ± 1.13   | W = 185                    | P = 0.0172               |
